# Supplementary material for: Protein intake and muscle mass of community-dwelling older adults: a cross-sectional study in Kigali, Rwanda
Source: Springer Nature journal article supplement (doi:10.1038/s41598-025-03291-2), 2025-05-24
Supplement: MOESM1 [file 41598_2025_3291_MOESM1_ESM.pdf]

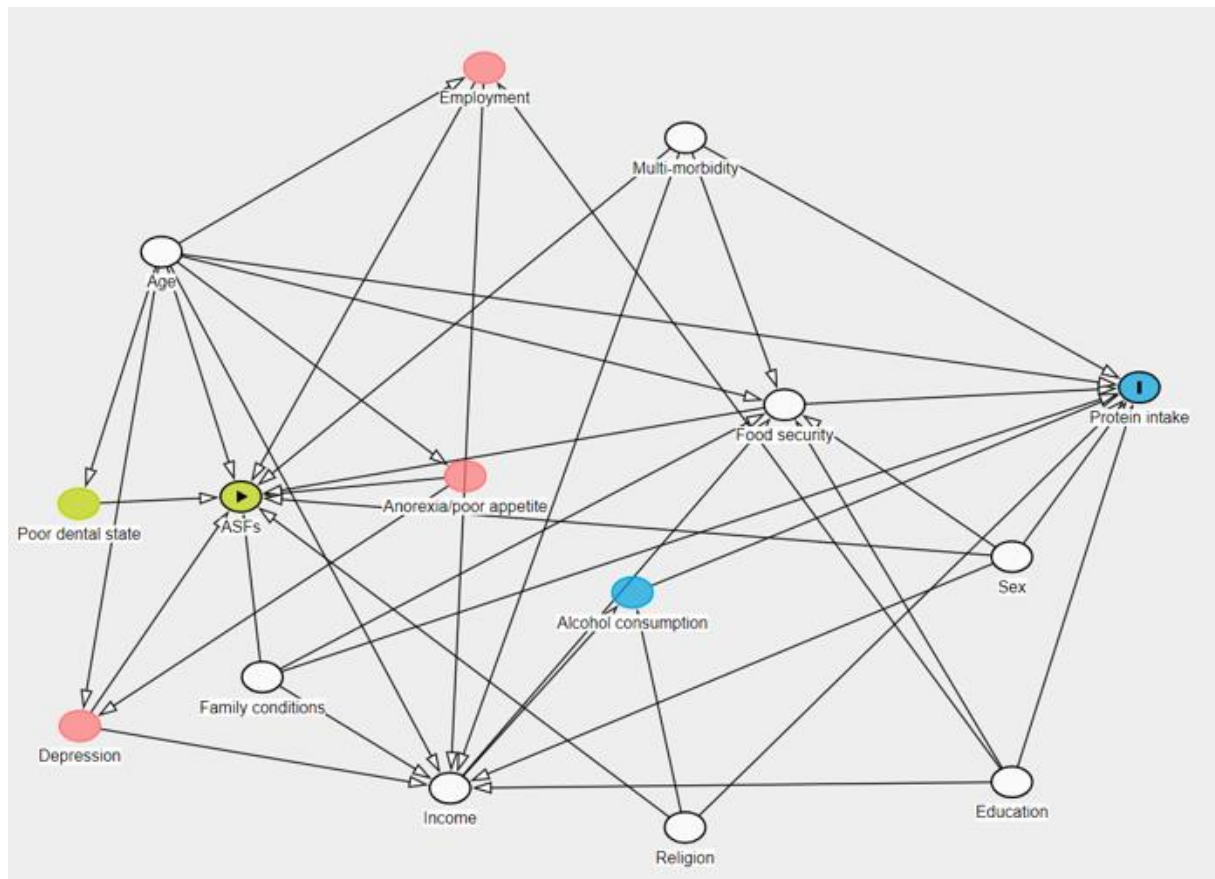

**Supplementary Figure 1:** Directed acyclic graph depicting an assumption on the causal structure of dependence between the exposures (ASF consumption), outcome (protein intake), and covariates.

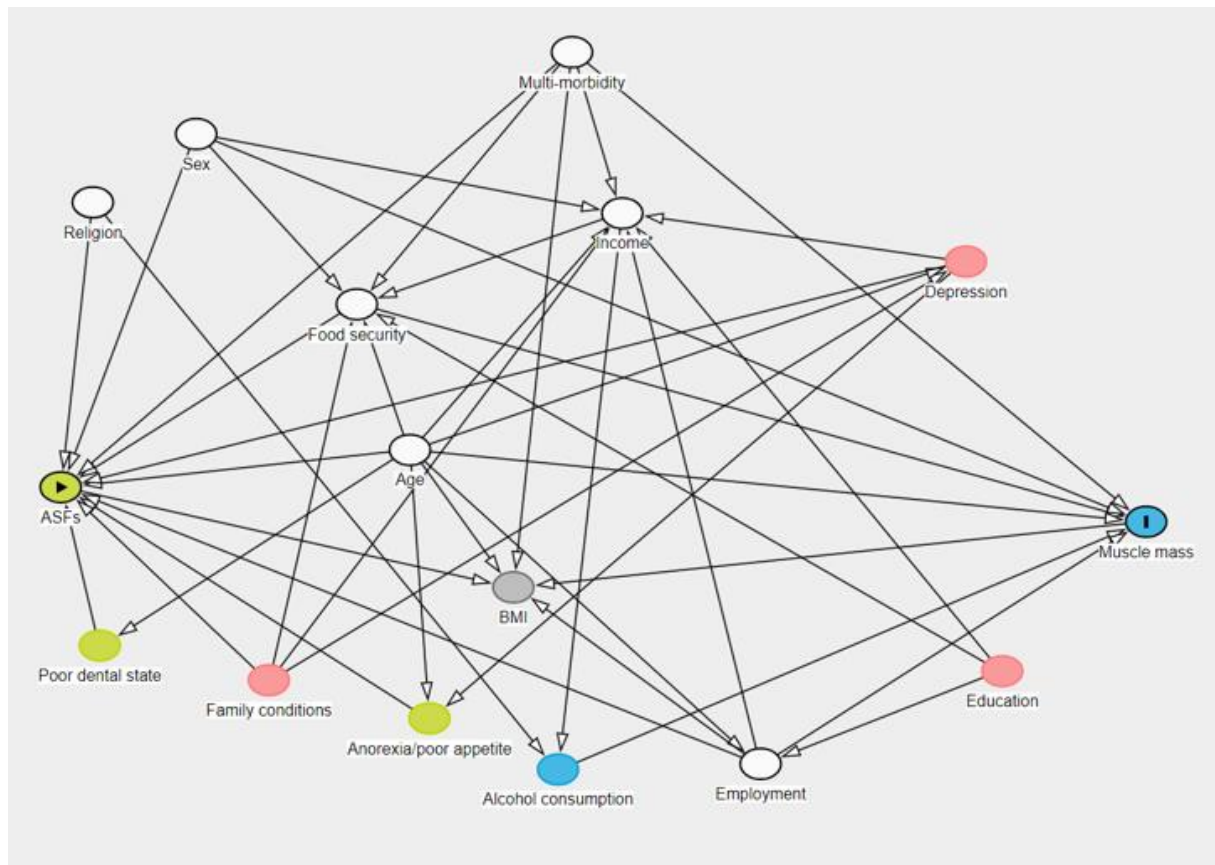

**Supplementary Figure 2:** Directed acyclic graph depicting an assumption on the causal structure of dependence between the exposure (ASF consumption), outcome (muscle mass), and covariates.

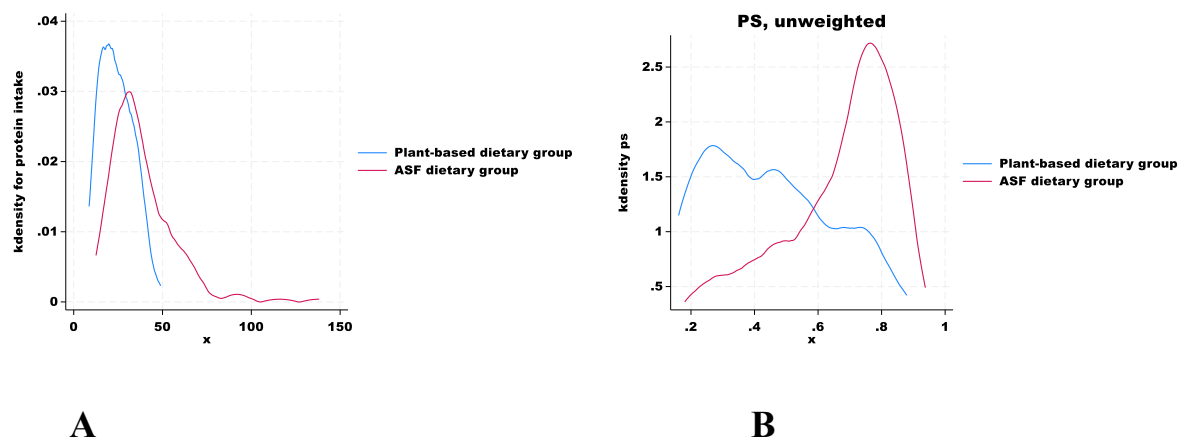

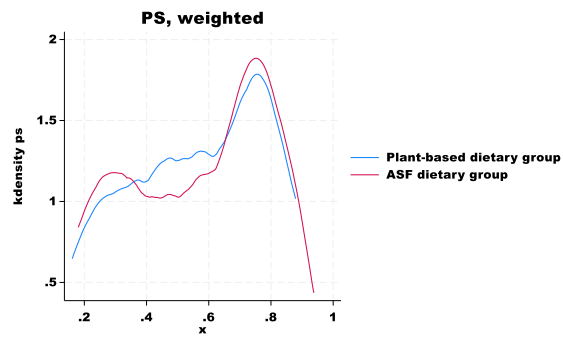

**C**

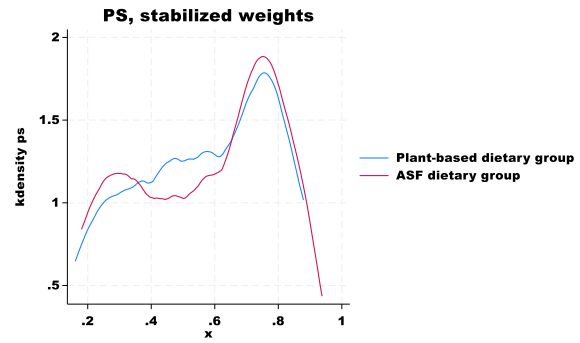

**D**

**Supplementary Figure 3:** A) Distribution of protein intake, B) Distribution propensity score (PS, unweighted), C) Distribution of weighted PS, D) Distribution of PS with stabilized weight.

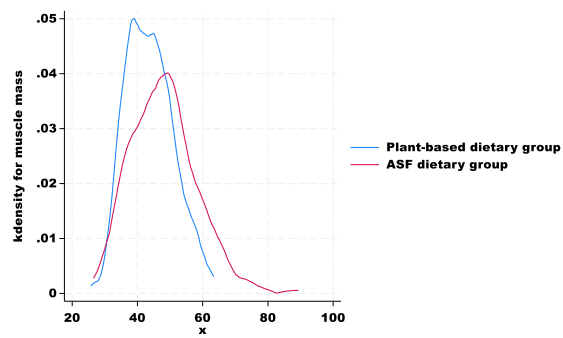

**A**

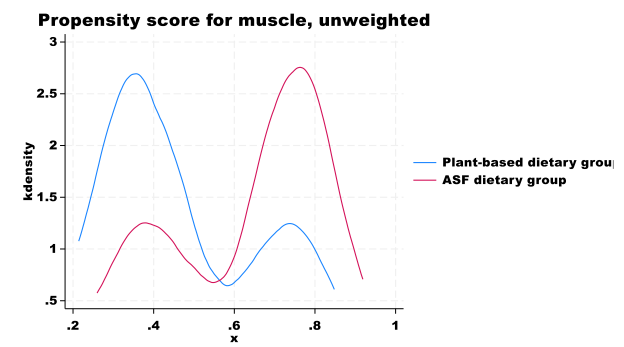

**B**

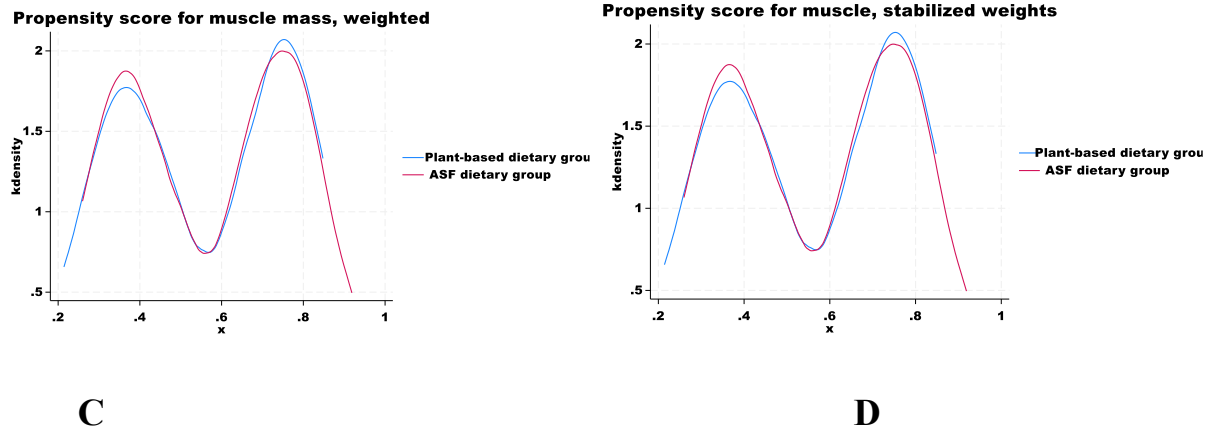

**Supplementary Figure 4:** A) Distribution of muscle mass, B) Distribution of propensity score (PS, unweighted), C) Distribution of weighted PS, D) Distribution of PS with stabilized weight.

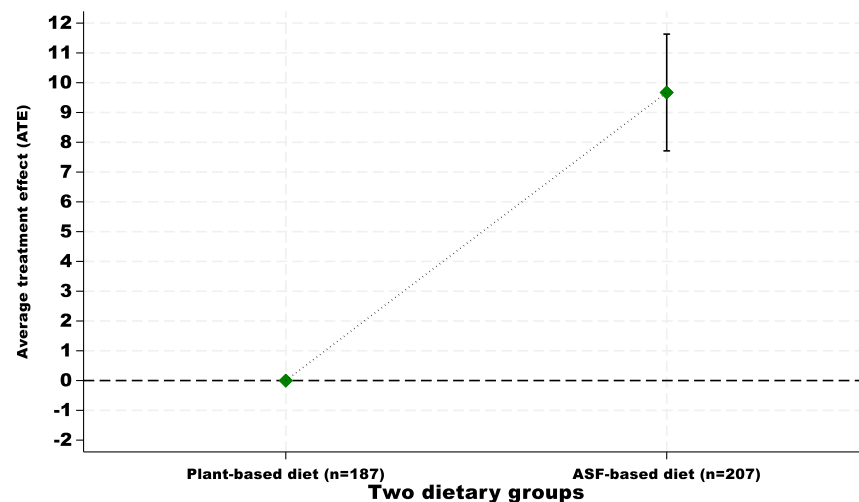

A

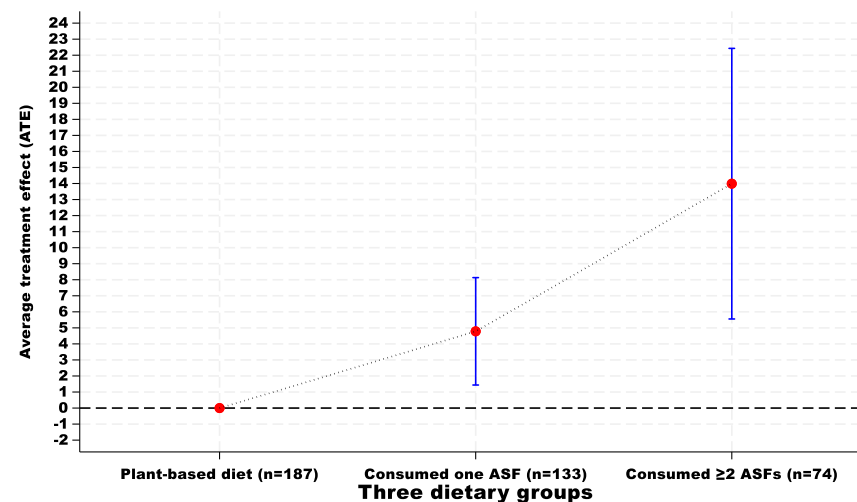

B

**Supplementary Figure 5.** The association between ASF consumption and protein intake in the study population, using two dietary groups (A) and three dietary groups (B) as independent (exposure) variable. Data are presented as average treatment effect (ATE) in g/d, with 95% confidence intervals (CIs). The analysis included the participants with extreme energy values.

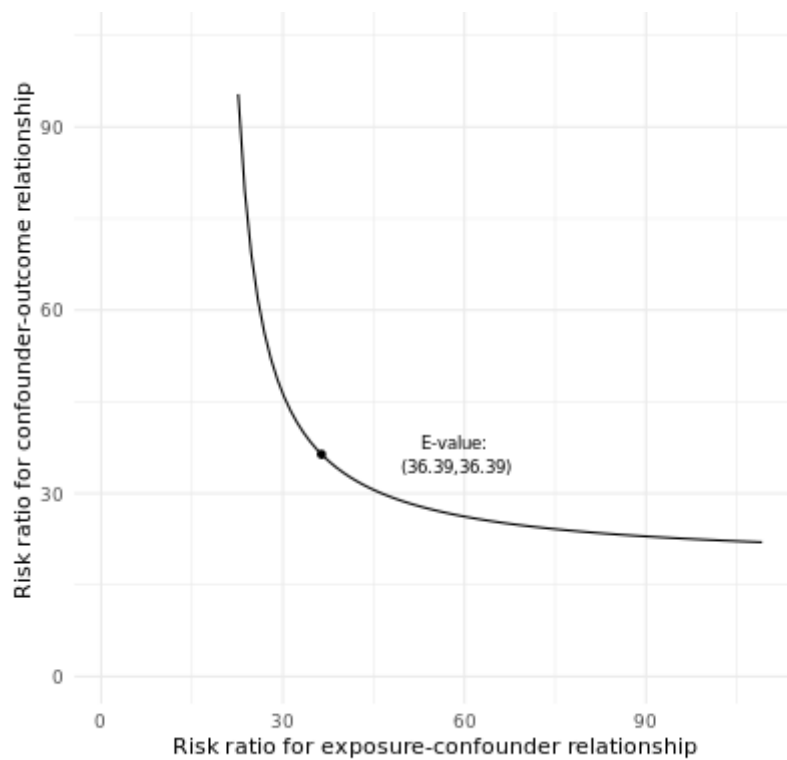

**Supplementary Figure 6.** E-value and lower confidence limit for the association between ASF consumption and protein intake. Each point along the curve defines a joint relationship between the two sensitivity parameters that could potentially explain away the association between ASF consumption and protein intake.

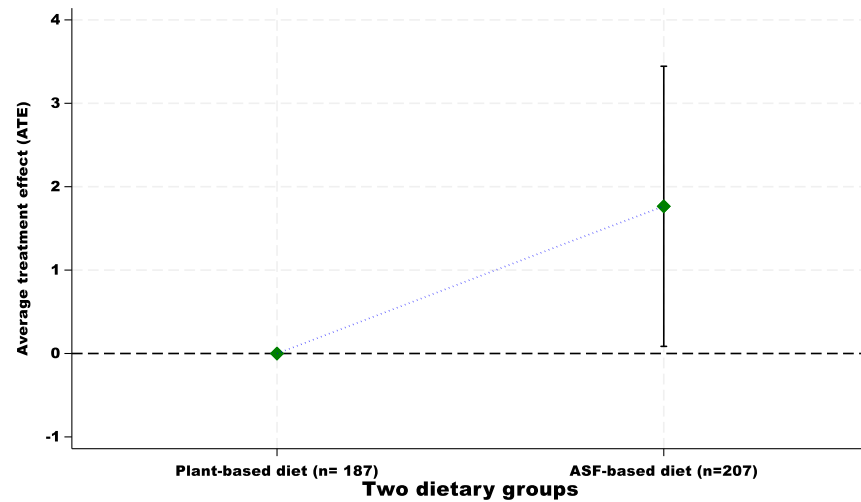

**A**

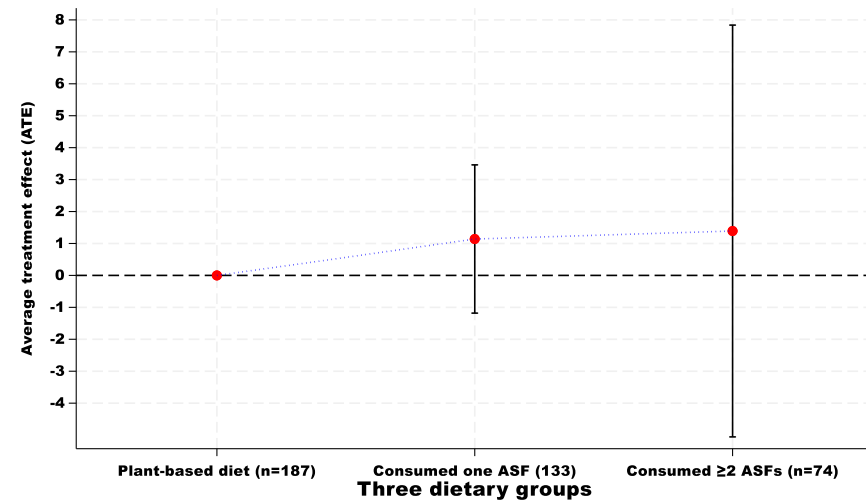

**B**

**Supplementary Figure 7.** The association between ASF consumption and muscle mass in the study population, using two dietary groups (**A**) and three dietary groups (**B**) as an independent (exposure) variable. Data are presented as average treatment effect (ATE) in kg, with 95% confidence intervals (CIs). The analysis included the participants with extreme energy values.

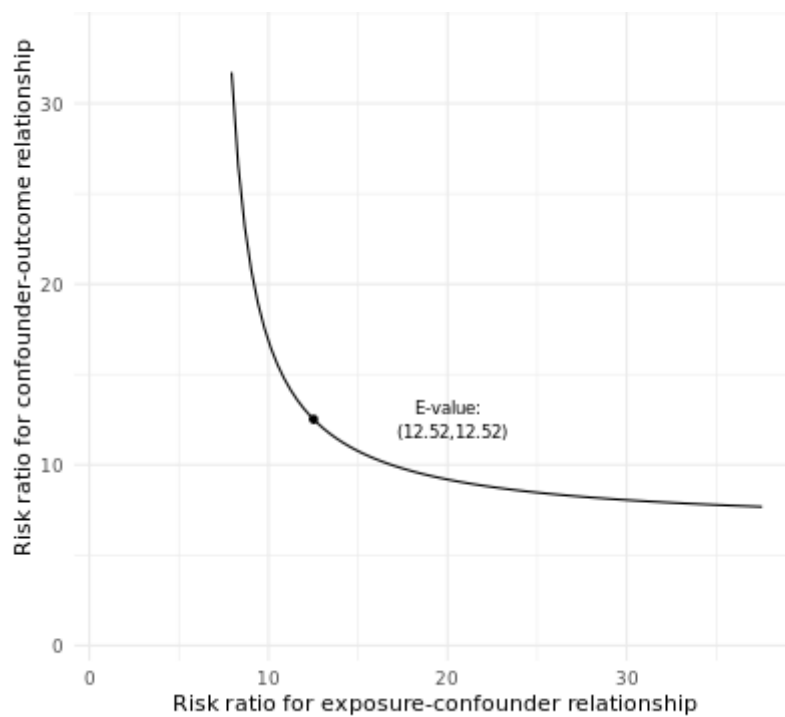

**Supplementary Figure 8.** E-values and lower confidence limit for the association between ASF consumption and muscle mass. Each point along the curve defines a joint relationship between the two sensitivity parameters that could potentially explain away the association between ASF consumption and muscle mass.



**Supplementary Table 1.** Background characteristics of the participants excluded from the study in median (IQR: 25%, 75%) or count (%)

|                                                | <b>All<br/>(N = 60)</b> | <b>Plant-based dietary<br/>group (N = 42)</b> | <b>ASF dietary<br/>group (n = 18)</b> |
|------------------------------------------------|-------------------------|-----------------------------------------------|---------------------------------------|
| Age, median (IQR)                              | 67 (62-73)              | 66 (60-72)                                    | 69 (65-77)                            |
| Age groups, n(%)                               |                         |                                               |                                       |
| 55 - 69 years                                  | 38 (63.3)               | 28 (66.7)                                     | 10 (55.6)                             |
| 70+ years                                      | 22 (36.7)               | 14 (33.3)                                     | 8 (44.4)                              |
| Sex, n(%)                                      |                         |                                               |                                       |
| Male                                           | 15 (25.0)               | 11 (26.2)                                     | 4 (22.2)                              |
| Female                                         | 45 (75.0)               | 31 (73.8)                                     | 14 (77.8)                             |
| Marital status, n (%)                          |                         |                                               |                                       |
| single /Separated/divorced                     | 21 (35.0)               | 14 (33.3)                                     | 7 (38.9)                              |
| Cohabiting/ Married                            | 39 (65.0)               | 28 (66.7)                                     | 11 (61.1)                             |
| Family size, median (IQR)                      | 4 (3-6)                 | 4 (2-6)                                       | 4 (3-6)                               |
| Categories of family size, n(%)                |                         |                                               |                                       |
| Small family                                   | 32 (53.3)               | 23 (54.8)                                     | 9 (50.0)                              |
| Large family                                   | 28 (46.7)               | 19 (45.2)                                     | 9 (50.0)                              |
| Education, n (%)                               |                         |                                               |                                       |
| No education                                   | 37 (61.7)               | 28 (66.7)                                     | 9 (50.0)                              |
| Primary education                              | 18 (30.0)               | 10 (23.8)                                     | 8 (44.4)                              |
| Secondary or higher                            | 5 (8.3)                 | 4 (9.5)                                       | 1 (5.6)                               |
| Religion, n(%)                                 |                         |                                               |                                       |
| Christian                                      | 57 (95.0)               | 40 (95.2)                                     | 17 (94.4)                             |
| Others                                         | 3 (5.0)                 | 2 (4.8)                                       | 1 (5.6)                               |
| Employment status, n(%)                        |                         |                                               |                                       |
| Unemployed                                     | 38 (63.3)               | 25 (59.5)                                     | 13 (72.2)                             |
| Work in non-physical labor/job                 | 4 (6.7)                 | 3 (7.1)                                       | 1 (5.6)                               |
| Work in physical labor/job                     | 18 (30.0)               | 14 (33.3)                                     | 4 (22.2)                              |
| Family conditions, n (%)                       |                         |                                               |                                       |
| Live with other people in the Household        | 53 (88.3)               | 36 (85.7)                                     | 17 (94.4)                             |
| Alone in the household                         | 7 (11.7)                | 6 (14.3)                                      | 1 (5.6)                               |
| Presence of other older adults in the HH, n(%) |                         |                                               |                                       |
| Without any older adults                       | 44 (73.3)               | 32 (76.2)                                     | 12 (66.7)                             |
| Living with other older adults                 | 16 (26.7)               | 10 (23.8)                                     | 6 (33.3)                              |
| Children under 5 years old in the HH, n(%)     |                         |                                               |                                       |
| No under5yrs children                          | 44 (73.3)               | 31 (73.8)                                     | 13 (72.2)                             |
| One or more under5yrs children                 | 16 (26.7)               | 11 (26.2)                                     | 5 (27.8)                              |
| Multiple NCDs, n(%)                            |                         |                                               |                                       |
| Less than three NCDS                           | 60 (100.0)              | 42 (100.0)                                    | 18 (100.0)                            |
| Food insecurity, n(%)                          |                         |                                               |                                       |
| Food secure                                    | 8 (13.3)                | 6 (14.3)                                      | 2 (11.1)                              |
| Moderate food insecurity                       | 14 (23.3)               | 9 (21.4)                                      | 5 (27.8)                              |
| Severe food insecurity                         | 38 (63.3)               | 27 (64.3)                                     | 11 (61.1)                             |
| Drink alcohol, n(%)                            |                         |                                               |                                       |
| No                                             | 60 (100.0)              | 42 (100.0)                                    | 18 (100.0)                            |

*HH, household; IQR (25%, 75%), Interquartile range*
